# Supplementary material for: Atomistic prediction on the configuration- and temperature-dependent dielectric constant of Be0.25Mg0.75O superlattice as a high-κdielectric layer
Source: Royal Society of Chemistry journal article supplement (doi:10.1039/d0tc05071g), 2020-12-22
Supplement: d0tc05071g2.pdf [file d0tc05071g2.pdf]

## **Electronic supplementary information**

Atomistic prediction on the configuration- and temperature-dependent dielectric  
constant of Be<sub>0.25</sub>Mg<sub>0.75</sub>O superlattice as a high-κ dielectric layer

Gyuseung Han<sup>1,2</sup>, In Won Yeu<sup>1</sup>, Kun Hee Ye<sup>1,2</sup>, Seung-Cheol Lee<sup>3</sup>, Cheol Seong Hwang<sup>\*,2</sup>,  
and Jung-Hae Choi<sup>\*,1</sup>

<sup>1</sup>*Center for Electronic Materials, Korea Institute of Science and Technology, Seoul 02792, Korea*

<sup>2</sup>*Department of Materials Science and Engineering and Inter-University Semiconductor Research Center, Seoul  
National University, Seoul 08826, Korea*

<sup>3</sup>*Indo-Korea Science and Technology Center, Bengaluru, 560065, India*

*\*Corresponding author;*

*Tel.: +82 2 880 7535. Fax: +82 2 884 1413*

*E-mail address: cheolsh@snu.ac.kr (C. S. Hwang)*

*Tel.: +82 2 958 5488. Fax: +82 2 958 6658*

*E-mail address: choijh@kist.re.kr (J.-H. Choi)*

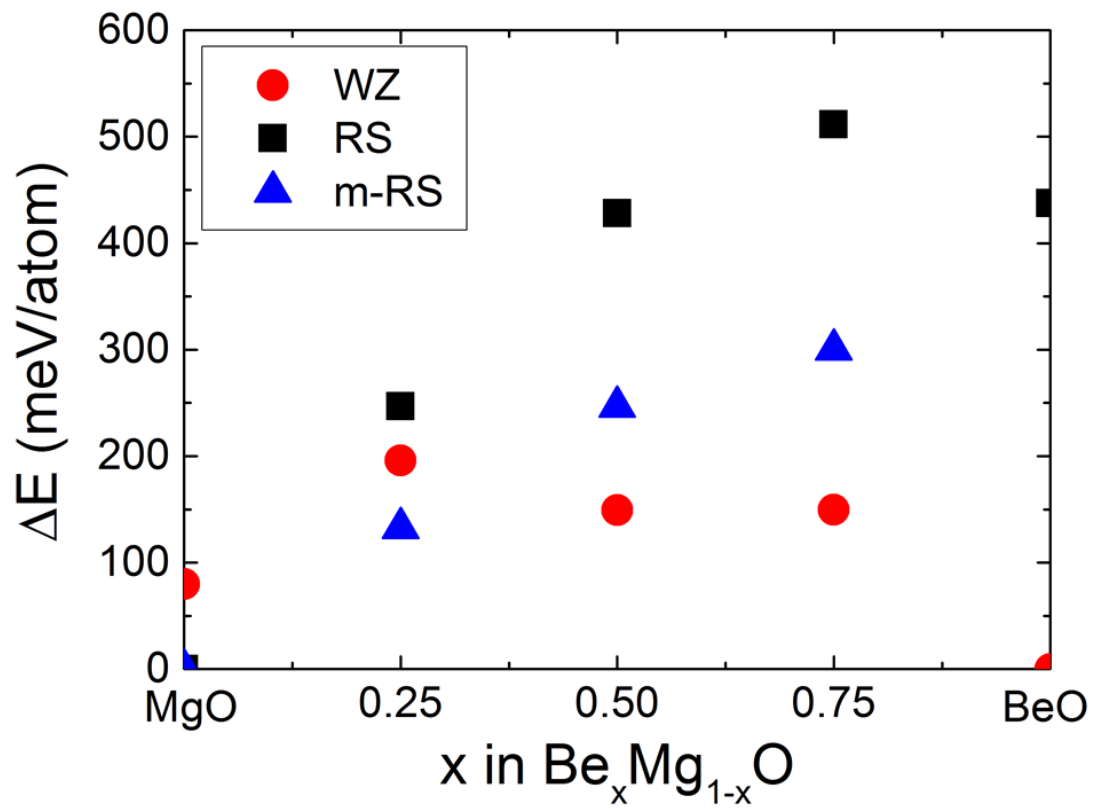

Figure S1.

Calculated  $\Delta E$  of WZ, RS, m-RS  $\text{Be}_x\text{Mg}_{1-x}\text{O}$  in 8-atom cell.

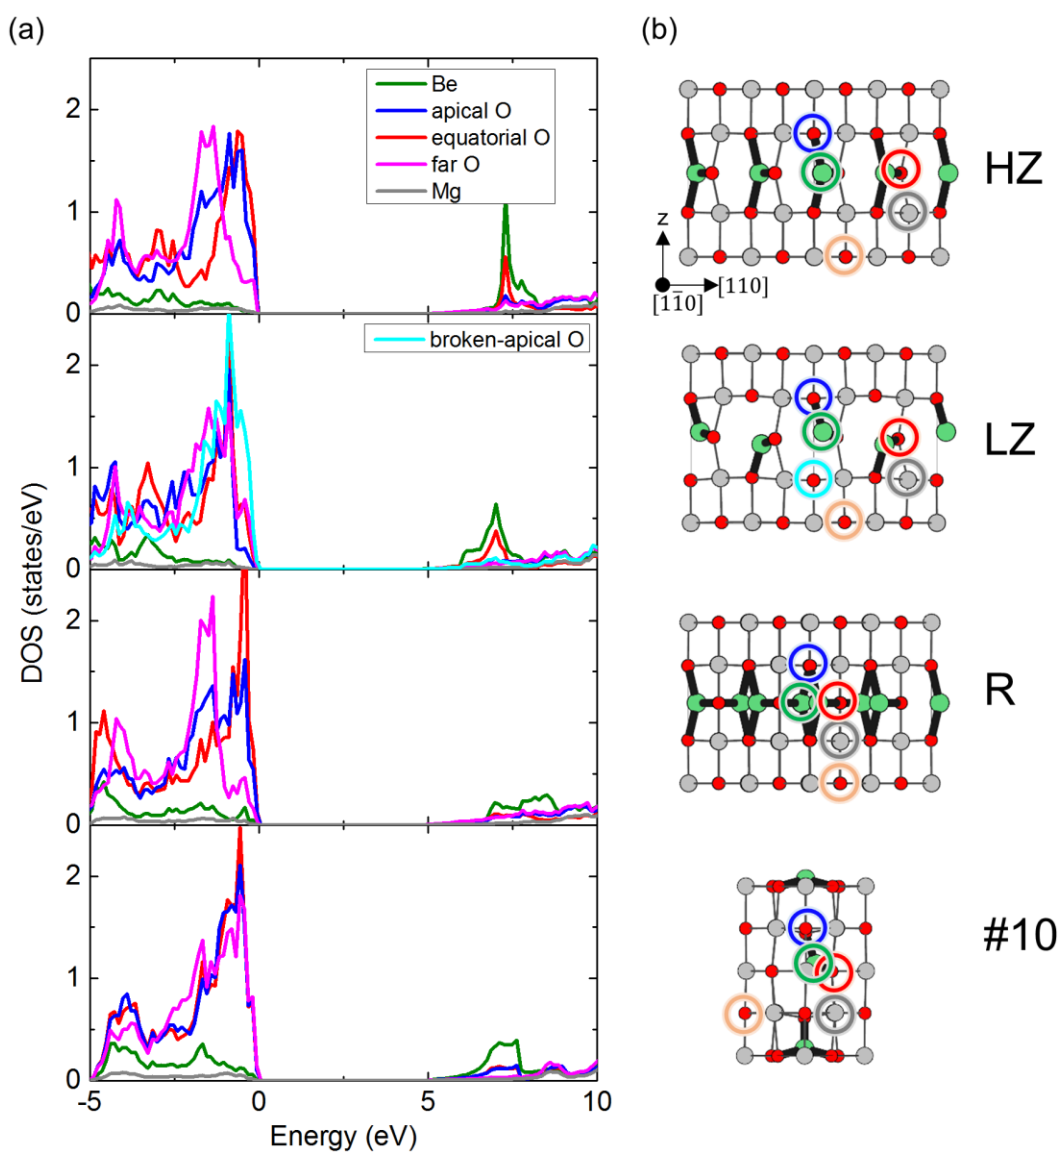

Figure S2.

(a) Partial density of states of *HZ*, *LZ*, *R*, and #10 and (b) corresponding atoms in each configuration marked by circles.

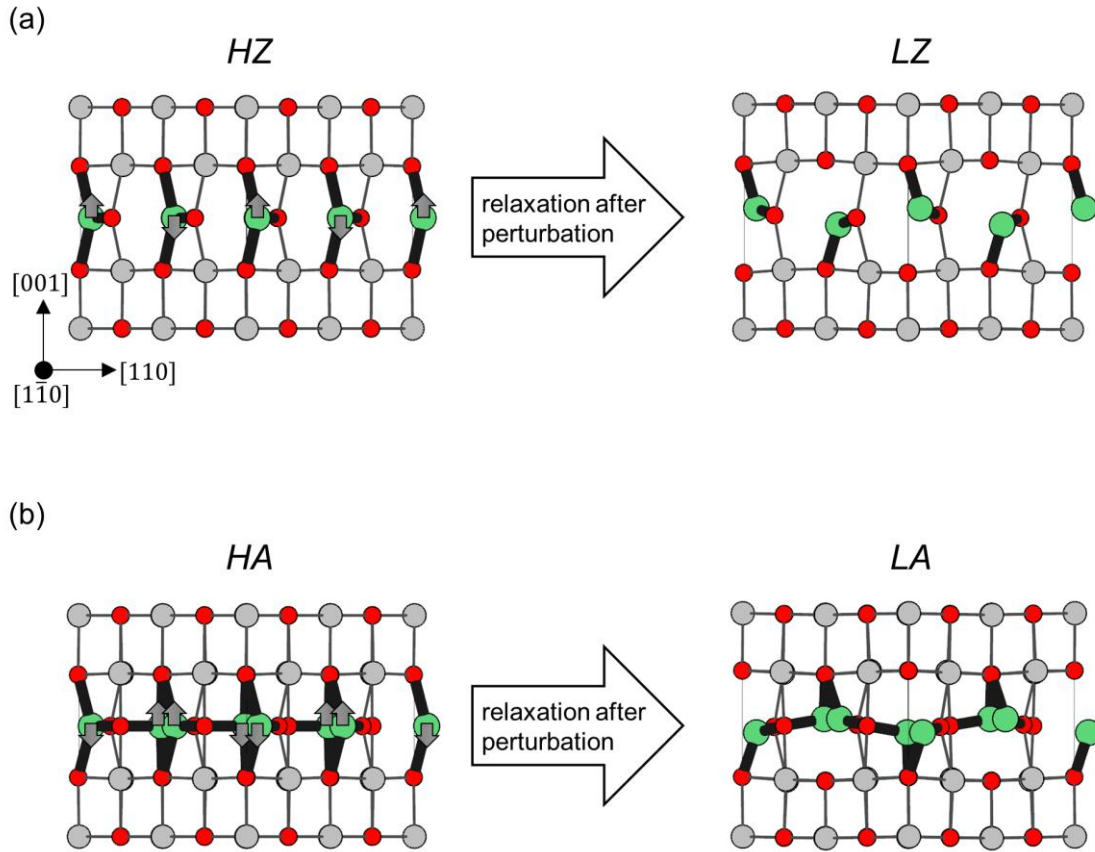

Figure S3.

Atomic positions of (a) *HZ* and *LZ* (b) *HA* and *LA*. The gray arrows indicate the atomic displacement induced by the phonon modes with the most negative eigenvalue at  $\Gamma$  of the high- $\kappa$ -type. When the atomic structure of the high- $\kappa$ -type is relaxed after a small perturbation along the atomic displacement by this phonon mode, configurations change from the high- $\kappa$ -type to the low- $\kappa$ -type.
